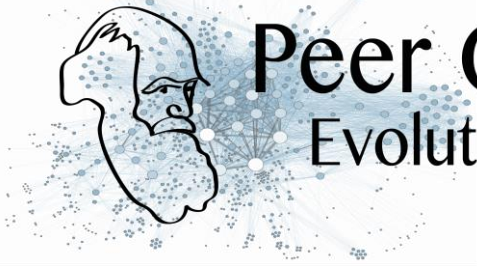

# Peer Community In Evolutionary Biology

Clemente SH, Santos I, Ponce AR, Rodrigues LR, Varela SAM & Magalhães S.  
2017.

**Despite reproductive interference, the net outcome of reproductive interactions among spider mite species is not necessarily costly.**  
*bioRxiv* 113274, <http://dx.doi.org/10.1101/113274>

**A Preprint reviewed and recommended by *Peer Community In Evolutionary Biology*.**

<http://dx.doi.org/10.24072/pci.evolbiol.100025>

1 **Despite reproductive interference, the net outcome of reproductive interactions**  
2 **among spider mite species is not necessarily costly**

3 Salomé H. Clemente<sup>1</sup>, Inês Santos<sup>1</sup>, Rita Ponce<sup>1</sup>, Leonor R. Rodrigues<sup>1</sup>, Susana A. M.  
4 Varela<sup>1,2\*</sup> and Sara Magalhães<sup>\*1,3</sup>

5 [salome.hc@gmail.com](mailto:salome.hc@gmail.com), [inesflsantos@gmail.com](mailto:inesflsantos@gmail.com), [anaritaponce@gmail.com](mailto:anaritaponce@gmail.com),

6 [leonor.rodrigues89@gmail.com](mailto:leonor.rodrigues89@gmail.com), [smvarela@igc.gulbenkian.pt](mailto:smvarela@igc.gulbenkian.pt), [snmagalhaes@fc.ul.pt](mailto:snmagalhaes@fc.ul.pt)

7 \*co-last authorship

8 <sup>1</sup> cE3c – Centre for Ecology, Evolution and Environmental Changes, Faculdade de  
9 Ciências da Universidade de Lisboa, Edifício C2, 3º Piso, Campo Grande, 1749-016  
10 Lisbon, Portugal

11 2 IGC – Instituto Gulbenkian de Ciência, 6 Rua da Quinta Grande, 2780-156 Oeiras,  
12 Portugal

13 <sup>3</sup>: [snmagalhaes@fc.ul.pt](mailto:snmagalhaes@fc.ul.pt)

14

15

16 **Abstract**

17 This preprint has been reviewed and recommended by Peer Community

18 in Evolutionary Biology (<http://dx.doi.org/10.24072/pci.evolbiol.100025>).

19 Reproductive interference is considered a strong ecological force, potentially leading

20 to species exclusion. This supposes that the net effect of reproductive interactions is

21 strongly negative for one of the species involved. Testing this requires a

22 comprehensive analysis of interspecific reproductive interactions, accounting for the

23 order and timing of mating events, and for their effects on either fertility or fecundity.

24 To this aim, we measured reproductive interactions between a focal species,

25 *Tetranychus urticae*, and an invasive (*T.evansi*) and a resident (*T. ludeni*) species,

26 varying the mating sequence and interval, and measuring the effect of such crosses on

27 fecundity and offspring sex ratio (a measure of fertility, as these species are

28 haplodiploid). We found that mating with heterospecifics affected fecundity and sex

29 ratio negatively, but also positively, depending on the species involved, and on the

30 order and timing of mating events. Overall, the net effect of reproductive interactions

31 was weak despite strong effects of particular events. In natural situations, the outcome

32 of reproductive interactions will thus hinge upon the frequency of each event.

33

34 **Keywords:**

35 Biological invasions, sperm precedence, *Tetranychus*, reproductive interactions,

36 mating.

37

## 38 **Introduction**

39 Reproductive interference, that is, any kind of sexual interaction between two species  
40 that diminishes the fitness of at least one of them (Gröning and Hochkirch 2008, Kishi  
41 et al. 2009, Burdfield-Steel and Shuker 2011), may have severe effects on the outcome  
42 of species interactions. Indeed, theory predicts that reproductive interference may  
43 contribute to species exclusion more often than resource competition (Gröning and  
44 Hochkirch 2008, Kishi et al. 2009, Kishi and Nakazawa 2013). For example, it has been  
45 posited that reproductive interference may underlie the success of some invasive  
46 species (e.g. Nishida et al. 2012).

47 Most studies of reproductive interference concern the fitness outcome of  
48 interspecific matings of two species that do not produce viable hybrids (Gröning and  
49 Hochkirch 2008). In this case, the reproductive effects of the interspecific interaction  
50 will be expressed only when organisms mate with both conspecifics and  
51 heterospecifics (as mating with heterospecifics alone will yield no offspring).  
52 Moreover, clearly evaluating the effects of reproductive interference on exclusion in  
53 polyandrous species necessitates measuring all possible combinations of mating order  
54 (*i.e.*, whether heterospecific matings occur before or after conspecific ones) and timing  
55 (*i.e.*, the interval between mating events) between pairs of species. It is also important  
56 to test whether reproductive interactions affect fecundity (egg production) or fertility  
57 (egg fertilization). This information can then be integrated to predict the net outcome  
58 of reproductive interactions between species. Despite the many studies on  
59 reproductive interference, none has yet applied this approach. Indeed, some studies  
60 attempt to predict how reproductive interference affects species exclusion, but do so

61 by focussing on some sequence events only. For example, Takafuji (1997) used a Lotka-  
62 Volterra modified model to predict the effect of reproductive interference between  
63 two mite species (*Panonychus citri* and *P. mori*) on species exclusion, but they used  
64 only one possible combination of mating interactions between species. In contrast,  
65 other studies consider different orders of mating events (eg, Kyogoku and Nishida  
66 2013), but do not integrate this information to generate a prediction concerning the  
67 net effect of reproductive interactions on species distributions.

68 Here, we aimed at testing how the outcome of different mating events among  
69 species may affect their life-history traits, using spider mites, a group where  
70 reproductive interference has been frequently observed (Collins and Margolies 1994;  
71 Takafuji et al. 1997; Ben-David et al. 2009, Sato et al. 2014). Spider mites are  
72 haplodiploid, hence the distinction between fecundity and fertilization effects can be  
73 made given that fertilized eggs result in female offspring and unfertilized eggs in male  
74 offspring. Thus, fertilization failures can be detected by a reduction in the proportion  
75 of female offspring, whereas impairment of egg production is detected by a reduction  
76 in the total number of offspring.

77 We used a system composed of one focal species, *Tetranychus urticae*, in  
78 sexual heterospecific interactions with another resident species, *T. ludeni*, and an  
79 invasive species, *T. evansi*. These three herbivorous species co-occur in the  
80 Mediterranean region and are often found on the same host plant (Escudero and  
81 Ferragut 2005, Boubou et al. 2012, Godinho et al. 2016). *T. urticae* and *T. ludeni* are  
82 resident species, and *T. evansi* has recently invaded the European continent, via  
83 Portugal (Boubou et al. 2012). Heterospecific matings among these species have been

84 observed, although they mostly do not result in viable offspring (Sato et al. 2014, 2016,  
85 Clemente et al. 2016, S. Magalhães pers. obs.). Moreover, *T. evansi* can exclude *T.*  
86 *urticae* on tomato plants (Sarmiento et al. 2011a), a result that correlates with field  
87 observations (Ferragut et al. 2013). Finally, a recent study has shown that, in  
88 competition with *T. evansi*, the population growth of *T. urticae* is more severely  
89 affected when plants are colonized by virgin females than when plants are colonized  
90 by mated females, suggesting that reproductive interference may be responsible for  
91 the species distribution patterns observed (Sato et al. 2014).

92 To postulate hypotheses concerning the consequences of heterospecific  
93 matings, it is crucial to understand within-species reproductive behaviour. *T. urticae*,  
94 the focal species, exhibits first male sperm precedence, with second matings being  
95 sometimes effective if they occur within the 24 hours following the first (Helle 1967).  
96 However, females that mate multiple times with conspecific males, after a 24h interval  
97 between matings, produce fewer fertilized offspring (*i.e.*, females) (Macke et al. 2012),  
98 suggesting that sperm displacement after 24h is possible. Here, we hypothesize that  
99 mating order and the mating interval will affect the outcome of reproductive  
100 interference in *T. urticae*. Also, given that *T. evansi*, the invasive species, displaces *T.*  
101 *urticae*, unlike *T. ludeni*, we expect the former to exert stronger effects than the latter.  
102 To this aim, we performed crosses between *T. urticae* and the two other species at  
103 different time intervals and with different mating orders, and measured the  
104 consequences for the two species involved in the cross.

105

106 **Material and Methods**

## 107 **Stock Cultures**

108 The mite species used in this study were collected in Carregado (39.022260, -  
109 8.966566), Portugal, and all laboratory populations were established from an initial  
110 pool of 300 mated females. The laboratory population of *T. urticae* was collected on  
111 tomato plants (*Solanum lycopersicum*) in May 2010, that of *T. evansi* on *Physalis*  
112 *angulata* in May 2012 and that of *T. ludeni* on tomato in September 2012. The  
113 populations of *T. evansi* and *T. ludeni* became extinct in August 2012 and May 2013,  
114 respectively, being subsequently replaced with populations from the same location,  
115 both collected in *Datura stramonium* plants. Both populations of *T. evansi* and *T.*  
116 *ludeni* were used in the experiments.

117       Species identity was confirmed through polymerase chain reaction–restriction  
118 fragment length polymorphism (PCR–RFLP) of the ITS2 region (Hurtado et al. 2008), on  
119 approximately 50 females of each population. Total genomic DNA was extracted from  
120 each individual spider mite using the Sigma-Aldrich GenElute™ Mammalian Genomic  
121 DNA Miniprep Kit, following manufacturer’s instructions, except for the elution  
122 volume, which we set to 20µL of RNase free water (Qiagen NV, Venlo, The  
123 Netherlands) to increase the concentration of DNA obtained from this very small  
124 animal (c.a. 300µm long).

125       Adult females from populations used in this experiment were screened for  
126 *Wolbachia* using the primers *wsp* (*Wolbachia*-specific primers) 81F and 691R (Braig et  
127 al. 1998). We did this to avoid potential cytoplasmic incompatibility as a confounding  
128 factor in our measurements. PCR assay procedures were as described in Breeuwer  
129 (1997). Results were positive for *Wolbachia* infection and all spider mite populations

130 were thus treated by placing adult females in detached bean leaves with tetracycline  
131 (0.025% w/v) for three consecutive generations, then absence of *Wolbachia* was  
132 confirmed using the same protocol as above. Other endosymbionts tested  
133 (Arsenophorous, Rickettsia, Spiroplasma and Cardinium) were absent from these  
134 populations.

135 Bean (*Phaseolus vulgaris*) and tomato (*Solanum lycopersicum*) plants were planted  
136 every week and grown in an herbivore-free greenhouse, being watered two to three  
137 times a week. *T. urticae* populations were maintained on trays with 6-10 bean plants  
138 whereas those of *T. evansi* and *T. ludeni* were kept on tomato plants at 25°C, both with  
139 a 16 L: 8D photoperiod. Plant trays were changed every two weeks, placing old leaves  
140 on top of uninfested plants. Cultures were kept inside plastic boxes (28x39x28 cm),  
141 with an opening of 25x15 cm polyamide fabric (80 µm mesh width).

142

143

#### 144 **Experimental procedure**

145 Experiments were done on the plant species from which the female tested had been  
146 cultured. As in the literature there was no information on whether hybridization is  
147 possible between *T. urticae* and *T. ludeni*, we studied the outcome of a single  
148 heterospecific mating between these two species (the same analysis for *T. urticae* and  
149 *T. evansi* was performed in a previous experiment (Clemente et al. 2016)).  
150 Subsequently, we set out to study the heterospecific interactions between *T. urticae*  
151 and the invasive *T. evansi* and the resident *T. ludeni* species for which we analysed the  
152 outcome of mating with a heterospecific male before or after a conspecific male. Since



153 we focused on interactions with *T. urticae* (the focal species of our study), we  
154 performed crosses between *T. urticae* males or females and *T. evansi* or *T. ludeni*  
155 males or females, but not between the two latter species. All experiments were  
156 performed in an acclimatized room at approximately 25°C.

157

158 **a) The outcome of a single heterospecific mating between *T. urticae* and *T. ludeni***

159 To determine whether hybridization occurred between *T. urticae* and *T. ludeni*, we  
160 measured the offspring sex-ratio resulting from single heterospecific matings. Given  
161 that only females develop from fertilized eggs, a whole-male offspring would mean  
162 unsuccessful hybridization. However, even in the absence of viable hybrids,  
163 heterospecific matings could result in aborted development of heterospecifically-  
164 fertilized eggs, meaning that females would produce fewer eggs. To test this, we  
165 compared the fecundity of *T. urticae* and *T. ludeni* females that mated with a  
166 heterospecific male to that of virgin females and of females mated with a conspecific  
167 male.

168 Females were collected from the stock populations, isolated at the quiescent  
169 deutonymph stage (which precedes their last moult before reaching adulthood), and  
170 kept in groups of approximately 15 females on bean (*Phaseolus vulgaris*) leaf discs  
171 (2 cm<sup>2</sup>) until emergence, to ensure their virginity. Adult males were collected from the  
172 same stock populations and kept isolated in leaf discs (2 cm<sup>2</sup>) for at least 24 hours  
173 before the assay, to ensure sperm replenishment. Females were placed individually in  
174 leaf discs (1 cm<sup>2</sup>) with either a conspecific or a heterospecific male and observed  
175 continuously until copulation occurred. Only matings that lasted at least 1 minute were

176 considered effective (Boudreaux 1963). These experiments had the maximum duration  
177 of 2 hours. If no mating occurred within this time, individuals were discarded.  
178 Subsequently, females were isolated in a leaf disc (2 cm<sup>2</sup>), then transferred to a new  
179 disc every three days until the female's death. The number of eggs laid was registered  
180 after female transfer to a new leaf disc. Eggs were left to develop until adulthood  
181 when offspring sex-ratio could be determined. With this data, we tested whether  
182 heterospecific matings affected (a) the mean daily fecundity and (b) offspring sex ratio  
183 (hence the proportion of fertilized offspring).

184

#### 185 **b) The outcome of heterospecific matings that precede or follow conspecific ones**

186 To determine the outcome of mating with a heterospecific male before or after a  
187 conspecific male between *T. urticae* and the other two species, we compared the  
188 fecundity and offspring sex ratio of those crosses to that of females that mated with  
189 two conspecific males. The experimental procedure was as described above, except  
190 that we let females mate with a conspecific or a heterospecific male, then placed the  
191 focal females with another male. We created the following mating sequences:  
192 conspecific-conspecific, conspecific-heterospecific and heterospecific-conspecific. The  
193 second mating occurred either immediately after the first mating (0 hours treatment)  
194 or 24 hours later. If no mating was observed within 2 hours, the females were  
195 discarded. We used the 0h and 24h mating intervals because the time interval was  
196 shown to affect the degree of sperm precedence in spider mites (Helle 1967).

197

#### 198 **Statistical analysis**

199 All analyses were carried out using R (version 3.3.2, R Development Core Team 2016).  
200 To analyse female fecundity within each species (*T. urticae*, *T. evansi* and *T. ludeni*), we  
201 used linear models (LM procedure), considering the mean number of eggs per day as  
202 the response variable (oviposition rate). To analyse offspring sex ratio within each  
203 species, we used generalized linear models (GLM procedure) with a quasi-binomial  
204 distribution – due to overdispersion of the data –, considering the number of female  
205 and male offspring produced by each focal female as the response variables (analysed  
206 together with the function `cbind`).

207 For both types of analyses, we used as fixed factors the mating order (with  
208 three levels: the control treatment, where a female mated twice with conspecific  
209 males; an experimental treatment where the heterospecific male was the first to mate  
210 with the female; and another experimental treatment where the heterospecific male  
211 was the second to mate with the female) and the mating interval (with two levels:  
212 either 0h or 24h interval between matings). We also tested the interaction among  
213 these fixed factors. If the interaction was non-significant, a backward stepwise  
214 procedure was used to find the best simplified fitted model. We performed  
215 independent analyses for each species within each species pair (i.e. for *T. urticae* and  
216 *T. evansi* females in *T. urticae* versus *T. evansi* crosses; and for *T. urticae* and *T. ludeni*  
217 females in *T. urticae* versus *T. ludeni* crosses).

218 We did a first block of experiments with the populations of *T. evansi* and *T.*  
219 *ludeni* collected in 2012 (block 1). For question b) we also did a second block of  
220 experiments with populations of those species from 2013 (block 2). In block 2 we did  
221 not repeat all treatments, but only the crosses that were not complete before the

222 extinction of block 1 populations, as well as their respective controls – hence, there  
223 were no treatments that were only performed in block 2. Because of that, instead of  
224 including the factor block in the statistical models as a covariate, we did all the  
225 statistical analyses with block 1 only and with block 1 and block 2 together. Since the  
226 results were qualitatively similar (Table S1), here we present the results from the  
227 analysis with block 1 and block 2 together.

228

## 229 **Results**

### 230 **a) The outcome of a single heterospecific mating between *T. urticae* and *T.*** 231 ***ludeni***

232 Crosses between *T. ludeni* and *T. urticae* resulted in 100% male offspring, indicating  
233 that hybrid production between these species is inexistent. The fecundity of *T. urticae*  
234 females that mated heterospecifically was not significantly different from that of virgin  
235 females or from that of females mated with a conspecific male ( $F_{2,78} = 1.886$ ,  $P = 0.1585$ ;  
236 Figure 1). On the other hand, the fecundity of *T. ludeni* females that mated with  
237 conspecifics or heterospecifics was significantly higher than that of virgin females  
238 ( $F_{2,66} = 5.636$ ,  $P = 0.0055$ ; Figure 1). Therefore, mating with heterospecific males does  
239 not result in the aborted fertilization of oocytes for *T. urticae* and *T. ludeni* females.

240

### 241 **b) The outcome of heterospecific matings that precede or follow conspecific** 242 **ones**

#### 243 *(i) T. urticae vs T. evansi*

244 The oviposition rate of *T. urticae* females that mated with either a conspecific and a  
245 heterospecific or with two conspecific mates varied significantly according to mating  
246 order in interaction with mating interval ( $F_{2,136} = 6.026$ ,  $P = 0.0031$ ). Specifically, it was  
247 higher for *T. urticae* females that mated with *T. evansi* males just before mating with a  
248 conspecific male than for any other cross at 0h mating interval ( $|t|(1) = 4.964$ ,  $P <$   
249  $0.0001$  and  $|t|(1) = 3.288$ ,  $P = 0.0009$ , in comparison with double conspecific matings  
250 and with matings with a conspecific followed by a mating with an heterospecific,  
251 respectively; Fig. 2a). At the 24h interval, however, mating combinations did not affect  
252 this trait. The proportion of fertilized offspring (*i.e.*, daughters) of females *T. urticae*  
253 also varied significantly according to mating order in interaction with mating interval  
254 ( $F_{2,106} = 57.219$ ,  $P = 0.007$ ). But in contrast to the oviposition rate, this trait was affected  
255 at the 24h interval only, in which mating with a *T. evansi* male after mating with a  
256 conspecific male resulted in a decrease in the proportion of fertilized offspring of *T.*  
257 *urticae* females, relative to other mating sequences ( $|t|(1) = 5.362$ ,  $P < 0.0001$  and  
258  $|t|(1) = 5.103$ ,  $P < 0.0001$ , in comparison with double conspecific matings and with  
259 matings with an heterospecific followed by a mating with a conspecific male,  
260 respectively; Fig. 2b).

261 The mating order also affected differentially the oviposition rate of *T. evansi*  
262 females, depending on the interval between matings ( $F_{2,187} = 4.977$ ,  $P = 0.0078$ ). *T.*  
263 *evansi* females that mated with *T. urticae* males immediately after conspecific mates  
264 had reduced oviposition rate relative to other mating sequences at this time interval  
265 ( $|t|(1) = 2.841$ ,  $P = 0.0050$  and  $|t|(1) = 2.692$ ,  $P = 0.0078$  in comparison with double  
266 conspecific matings and with matings with a heterospecific followed by a mating with a

267 conspecific male, respectively; Fig. 2c); however, if the heterospecific cross occurred  
268 24 hours before the conspecific cross, the oviposition rate of *T. evansi* females  
269 increased relative to double conspecific matings at this time interval ( $|t|(1) = 2.948$ ,  $P$   
270  $= 0.0036$ ; Fig. 2c). These crosses did not significantly affect sex ratio ( $F_{2,111}=3.786$ ,  $P=$   
271  $0.6923$ ; Fig. 2d).

272

273 (ii) *T. urticae* vs *T. ludeni*

274 In crosses with the resident species (*T. ludeni*), the oviposition rate of *T. urticae*  
275 females varied significantly according to mating order in interaction with mating  
276 interval ( $F_{2,144} = 3.694$ ,  $P = 0.0273$ ). Specifically, we found that, at 0h interval, females  
277 that mated first with a conspecific then with a heterospecific male had higher  
278 oviposition rate than females that mated first with a heterospecific then with a  
279 conspecific male ( $|t|(1) = 2.736$ ,  $P = 0.0070$ ; Fig. 3a). At the 24h interval, the  
280 oviposition rate of females that mated first with a conspecific then with a  
281 heterospecific male was lower than that of double conspecific crosses. ( $|t|(1) = 2.505$ ,  
282  $P = 0.0134$ ; Fig. 3a). *T. urticae* females suffered no significant changes in offspring sex  
283 ratio from matings with *T. ludeni* males ( $F_{2,99} = 10.769$ ,  $P = 0.3195$ ; Figure 3b).

284 In *T. ludeni* females, the oviposition rate and the proportion of fertilized  
285 offspring varied significantly according to mating order in interaction with the mating  
286 interval ( $F_{2,248} = 14.098$ ,  $P < 0.0001$  and  $F_{2,152} = 158.690$ ,  $P < 0.0001$ , for oviposition rate  
287 and proportion of fertilized offspring respectively). Compared to the control  
288 treatment, *T. ludeni* females had lower oviposition rate when mating with *T. urticae*  
289 males immediately before conspecifics males ( $|t|(1) = 2.605$ ,  $P = 0.0097$ ; Fig. 3c). At

290 the 24 hour interval, the conspecific crosses yielded higher oviposition rate than all  
291 other crosses in this time interval ( $|t|(1) = 4.646$ ,  $P < 0.0001$  and  $|t|(1) = 3.805$ ,  $P =$   
292  $0.0002$ , in comparison with females mating with a conspecific before an heterospecific  
293 male and females mating with an heterospecific before mating with a conspecific,  
294 respectively; Fig. 3c). Additionally, when *T. ludeni* females mated with *T. urticae* males  
295 24h after conspecific matings, the proportion of fertilized offspring was significantly  
296 lower than that of other crosses at this time interval ( $|t|(1) = 4.084$ ,  $P < 0.0001$  and  
297  $|t|(1) = 3.586$ ,  $P = 0.0005$ , in comparison with double conspecific matings and with  
298 females mating with a heterospecific before mating with a conspecific, respectively;  
299 Figure 3d). The mating sequence had no effect on the sex ratio at the 0h interval.

300

### 301 **Discussion**

302 In this study, we investigated the consequences of mating with heterospecifics for the  
303 fertilization success and offspring viability in a system composed of three spider-mite  
304 species. We found that heterospecific matings between *T. urticae* and *T. ludeni* did not  
305 result in fertilized offspring (i.e., females), nor did it have any negative effects on egg  
306 viability, as shown for matings between *T. urticae* and *T. evansi* (Sato et al. 2014,  
307 Clemente et al. 2016). In fact, *T. ludeni* females that mate with *T. urticae* males  
308 produce more (male) offspring than virgin *T. ludeni* females. Second, the effects of  
309 heterospecific matings on the outcome of previous or subsequent matings with  
310 conspecifics were highly dependent on the species pair involved, on the trait measured  
311 and on the timing and order of mating events. Despite strong effects of particular

312 mating sequences, the results taken as a whole suggest that the net effect of  
313 reproductive interactions between species is relatively weak.

314 Positive effects of interspecific reproductive interactions were found for  
315 fecundity. This can be due to a stimulation of oogenesis by the sperm of heterospecific  
316 males, increasing the availability of oocytes to subsequent matings with conspecifics.  
317 Indeed, oogenesis is stimulated by conspecific sperm in several species (Qazi et al.  
318 2003, Xu and Wang 2011). This could also be the case with heterospecific sperm. If so,  
319 it could explain the higher fecundity found in crosses between *T. urticae* and *T. evansi*.  
320 In fact, earlier studies have documented that interactions with heterospecific males  
321 are not always negative. In some gynogenetic species, heterospecific mating is a  
322 prerequisite for embryogenesis (Gumm and Gabor 2005, Schlupp 2010). Moreover, in  
323 some invertebrate species, females receive nuptial gifts from heterospecific males  
324 (Vahed 1998, Costa-Schmidt and Machado 2012). However, to our knowledge, this is  
325 the first time that an increase in fecundity following a heterospecific mating is  
326 described in the literature. Such effects may thus be rare. Still, earlier studies may have  
327 overlooked them because they have not examined the roles of the order of mating in  
328 the outcome of heterospecific mating interactions.

329 Nonetheless, we also detected several negative effects of mating with  
330 heterospecifics, as found in most studies of reproductive interference (Gröning and  
331 Hochkirch 2008, Kishi 2015). We found both a reduction in the number of eggs laid and  
332 a decrease in fertilization success (i.e., offspring sex ratio). Whereas lower fecundity  
333 will most likely be costly in all ecological scenarios (assuming no trade-off with other  
334 traits), a decrease in fertilization success, leading to an excess of males in the



335 population, will have an impact on fitness that is contingent upon the structure of  
336 spider-mite populations. Indeed, a higher frequency of males is likely to be more  
337 detrimental in recently-established populations, generally founded by a single female.  
338 In those populations, the optimal sex ratio is highly female-biased, hence a higher  
339 proportion of males is probably very costly. This is not the case in more panmictic  
340 populations, usually found when mites are established on a plant for a longer period  
341 (Roeder 1992, Macke et al. 2011). One also can speculate that a higher proportion of  
342 males may impose a strong cost in the other, competing species (assuming detrimental  
343 effects of heterospecific matings are stronger than positive effects). However, this  
344 behaviour is expected to be selected in males only if the cost they pay in terms of  
345 sperm loss is compensated by the benefit they would provide to their sisters. Hence,  
346 this behaviour is more likely to be selected in more structured populations.

347         Reproductive interference occurred independently of the order of matings and  
348 the time interval. This is at odds with expectations stemming from findings on  
349 conspecific matings, which show (a) first-male precedence and (b) exceptions to this  
350 rule only if the second male mates immediately after the first (Helle 1967). Therefore,  
351 the first male precedence found in conspecific matings cannot be extrapolated to  
352 matings involving heterospecific sperm. This contrasts with the recent finding that  
353 effects of heterospecific matings in *Drosophila* could be predicted from the harmful  
354 effects of conspecific mates (Yassin and David 2015), and that genes involved in  
355 conspecific male precedence also affect sperm precedence in multiple matings  
356 involving heterospecifics (Civetta and Finn 2014). Thus, the equivalence of effects of  
357 conspecific and heterospecific sperm on the outcome of conspecific matings is

358 dependent on the type of effect and/or the species involved in the interaction. The  
359 mechanisms of sperm displacement in heterospecific matings in spider mites should  
360 therefore be investigated.

361         Since effects of heterospecific matings depend on the order and timing of  
362 occurrence, the outcome of interspecific reproductive interactions will depend on the  
363 frequency with which those different types of matings occur in nature. This, in turn,  
364 will depend on the discrimination abilities between species. First, these interactions  
365 will occur only if species discrimination is weak. This, indeed, has been explicitly  
366 demonstrated for the *T. evansi*/*T. urticae* interaction (Clemente et al. 2016), but not  
367 for *T. ludeni*/*T. urticae*. Still, these species do mate with heterospecifics under no  
368 choice scenarios, as shown here, hence the scope for the occurrence of reproductive  
369 interference does exist.

370         What then, would be the relative frequency of the mating sequences tested  
371 here? In spider mites, conspecific males often guard quiescent females (*i.e.*, the last  
372 larval stage before becoming adult female), to ensure mating immediately after  
373 emergence. If males guard preferentially conspecific females, as shown in other spider  
374 mite species pairs (Collins et al. 1993, Takafuji et al. 1997), heterospecific matings will  
375 occur more often after rather than before conspecific ones. Hence, this leads to the  
376 prediction that the most common mating sequence among these species will be a  
377 heterospecific mating following a conspecific one. In this case, the detrimental effects  
378 of heterospecific matings for *T. urticae* females, are only visible when the two matings  
379 happen in close succession, while for *T. evansi* females, these effects are only apparent  
380 when the two matings occurred 24 hours apart. Since latency to copulation is not

381 statistically different for these time intervals (Clemente et al. 2016), one expects these  
382 events to occur at similar frequency. However, since the effect of these heterospecific  
383 matings for *T. evansi* females is a reduction in fecundity, while for *T. urticae* it is an  
384 increase in the proportion of male offspring, the cost may be higher for *T. evansi*  
385 females (cf. above). Moreover, the excess of males produced by *T. urticae* can lead to  
386 more detrimental matings with *T. evansi* females, while reducing the probability of *T.*  
387 *urticae* females mating with a heterospecific male. This would mean that the invasive  
388 species would suffer more from reproductive interference than the resident.

389         Even assuming that all mating combinations do occur, reproductive interactions  
390 between *T. urticae* and *T. evansi* can be positive or negative for the two species,  
391 depending on the mating sequence. Moreover, reproductive interference between *T.*  
392 *urticae* and *T. ludeni* is stronger than that between *T. urticae* and *T. evansi*. Therefore,  
393 reproductive interference cannot be invoked to explain the exclusion of *T. urticae* in  
394 habitats with *T. evansi* (Ferragut et al. 2013, Sarmiento et al. 2011b). Other factors may  
395 contribute to this exclusion, as the production of a dense web by *T. evansi*, which  
396 prevents heterospecifics from accessing the surface of the leaves to feed and oviposit  
397 (Sarmiento et al. 2011b). Importantly, however, we show that the occurrence and  
398 strength of reproductive interference cannot be assessed with the unique evaluation  
399 of the outcome of a specific type of reproductive interaction. The different types of  
400 mating combinations – the order and interval between matings – have great influence  
401 on the overall outcome of heterospecific interactions and on the relative frequency of  
402 such events. This confirms the importance of using complete experimental designs on  
403 the detection and characterization of reproductive interference.

404

405 **Acknowledgements**

406 The authors wish to thank Yukie Sato and Maurice W. Sabelis for helpful discussions  
407 during the early stages of this work. These experiments and Inês Santos were funded  
408 by Portuguese National Funds through an FCT-ANR project (FCT-ANR//BIA-  
409 EVF/0013/2012) to SM and Isabelle Olivieri. SHC and LRR had PhD fellowships funded  
410 by FCT (SFRH/BD/90156/2012 and SFRH/BD/87628/2012, respectively). SAMV and RP  
411 had Post-doctoral fellowships from FCT, (SFRH/BPD/66042/2009) and  
412 (SFRH/BPD/42801/2008) respectively. The authors declare no conflict of interest.

413

414 **FIGURE LEGENDS**

415

416 **Figure 1** | Average daily fecundity of virgin females, and of females that have mated  
417 with a conspecific or a heterospecific male. Tu: *T. urticae* males or females; Tl: *T. ludeni*  
418 males or females. Grey bars: matings involving *T. urticae* females; white bars: matings  
419 involving *T. ludeni* females. Error bars represent the standard errors of the mean.  
420 Numbers on the bottom of bars represent the sample size for each type of mating.

421

422 **Figure 2** | Average daily fecundity and estimated offspring sex ratio resulting from  
423 interactions between *T. urticae* (a, b; grey solid bars) and *T. evansi* (c,d; striped bars)  
424 females with conspecific and heterospecific males. In each plot, bars on the left side of  
425 the dotted straight line correspond to treatments where second matings occurred  
426 immediately (0h) after the first one; bars on the right side correspond to treatments  
427 where second matings occurred 24h after the first one. "1st M": first male that mated  
428 with the female; "2nd M": second male. The interval indicates the time of occurrence  
429 of the second mating, i.e., if immediately after the first mating (0h) or 24h later. "Tu":  
430 *T. urticae* males; "Te": *T. evansi* males. Letters above the bars indicate significant  
431 differences among treatments (small letters: among crosses occurring with a 0h  
432 interval; capital letters: among crosses occurring with a 24h interval). Error bars  
433 represent the standard errors of the mean. For offspring sex ratio, we obtained the  
434 estimates of the probability of being female and correspondent standard errors of the  
435 mean from the statistical GLM models. This takes into account sex ratio variation

436 among females, as well as the quasi-binomial correction for overdispersion of the data.

437 Numbers on the bottom of bars represent the sample size for each type of mating.

438

439 **Figure 3** | Average daily fecundity and estimated offspring sex ratio resulting from

440 interactions between *T. urticae* (plots a, b; grey bars) and *T. ludeni* (plots c, d; white

441 bars) females with conspecific and heterospecific males. In each plot, bars on the left

442 side of the dotted line correspond to treatments where second matings occurred

443 immediately (0h) after the first one; bars on the right side correspond to treatments

444 where second matings occurred 24h after the first one. "1st M": first male that mated

445 with the female; "2nd M": second male. The interval indicates the time of occurrence

446 of the second mating, i.e., if immediately after the first mating (0h) or 24h later. "Tu":

447 *T. urticae* males; "Tl": *T. ludeni* males. Letters above the bars indicate the significant

448 differences between treatments (small letters: among crosses occurring with a 0h

449 interval; capital letters: among crosses occurring with a 24h interval. Error bars

450 represent the standard errors of the mean. For offspring sex ratio, we obtained the

451 estimates of the probability of being female and correspondent standard errors of the

452 mean from the statistical GLM models. This takes into account sex ratio variation

453 among females, as well as the quasi-binomial correction for overdispersion of the data.

454 Numbers on the bottom of bars represent the sample size for each type of mating.

455

456

457

458

459 **References**

- 460 Ben-David T, Gerson U, Morin S. 2009. Asymmetric reproductive interference between  
461 two closely related spider mites: *Tetranychus urticae* and *T. turkestanii* (Acari:  
462 Tetranychidae). *Exp Appl Acarol.* 48: 213-227.
- 463 Braig HR, Zhou W, Dobson SL, O'Neill SL. 1998. Cloning and characterization of a gene  
464 encoding the major surface protein of the bacterial endosymbiont *Wolbachia pipientis*.  
465 *J Bacteriol.* 180: 2373–2378.
- 466 Breeuwer JA. 1997. *Wolbachia* and cytoplasmic incompatibility in the spider mites  
467 *Tetranychus urticae* and *T. turkestanii*. *Heredity.* 79: 41–47.
- 468 Boubou A, Migeon A, Roderick GK, Auger P, Cornuet JM, Magalhães S, Navajas M.  
469 2012. Test of colonisation scenarios reveals complex invasion history of the red tomato  
470 spider mite *Tetranychus evansi*. *PLoS One.* 7: 35601.
- 471 Boudreaux HB. 1963. Biological aspects of some phytophagous mites. *Annu Rev*  
472 *Entomol.* 8: 137–154.
- 473 Burdfield-Steel ER, Shuker DM. 2011. Reproductive interference. *Curr Biol.* 21: 450–  
474 451.
- 475 Civetta A, Finn S. 2014. Do candidate genes mediating conspecific sperm precedence  
476 affect sperm competitive ability within species? A test case in *Drosophila*. *G3*  
477 (Bethesda). 4: 1701-1707.

- 478 Clemente SH, Rodrigues LR, Ponce R, Varela SAVM, Magalhães S. 2016. Incomplete  
479 species recognition entails few costs in spider mites, despite first-male precedence.  
480 Behav Ecol Sociobiol. 70: 1161-1170.
- 481 Collins RD, Margolies DC, Rose S. 1993. Guarding behavior and reproductive isolation  
482 in two tetranychid mite species (Acari: Tetranychidae). Ann Entomol Soc Am. 86: 111-  
483 116.
- 484 Collins R, Margolies D. 1994. The effect of interspecific mating on sex ratios in the  
485 twospotted spider mite and the Banks grass mite (Acarina: Tetranychidae).  
486 J Insect Behav. 8: 189–206.
- 487 Costa-Schmidt LE, Machado G. 2012. Reproductive interference between two sibling  
488 species of gift-giving spiders. Anim Behav. 84: 1201-1211.
- 489 Escudero L, Ferragut F. 2005. Life-history of predatory mites *Neoseiulus californicus*  
490 and *Phytoseiulus persimilis* (Acari: Phytoseiidae) on four spider mite species as prey,  
491 with special reference to *Tetranychus evansi* (Acari: Tetranychidae). Biol Control. 32:  
492 378-384.
- 493 Ferragut F, Garzón-Luque E, Pekas A. 2013. The invasive spider mite *Tetranychus*  
494 *evansi* (Acari: Tetranychidae) alters community composition and host-plant use of  
495 native relatives. Exp Appl Acarol. 60: 321-341.
- 496 Godinho DP, Janssen A, Dias T, Cruz C, Magalhães S. 2016. Down-regulation of plant  
497 defence in a resident spider mite species and its effect upon con- and heterospecifics.  
498 Oecologia. 180: 161-167.



- 499 Gröning J, Hochkirch A. 2008. Reproductive interference between animal species. Q  
500 Rev Biol. 83: 257-282.
- 501 Gumm JM, Gabor CR. 2005. Asexuals looking for sex: conflict between species and  
502 mate-quality recognition in sailfin mollies (*Poecilia latipinna*). Behav Ecol Sociobiol. 58:  
503 558–565.
- 504 Helle W. 1967. Fertilization in the two-spotted spider mite (*Tetranychus urticae*: Acari).  
505 Entomol Exp Appl. 10: 103–110.
- 506 Hurtado MA, Ansaloni T, Cros-Arteil S, Jacas J, Navajas M. 2008. Sequence analysis of  
507 the ribosomal internal transcribed spacers region in spider mites (Prostigmata:  
508 Tetranychidae) occurring in citrus orchards in Eastern Spain: use for species  
509 discrimination. Ann Appl Biol. 153: 167-174.
- 510 Kishi S. 2015. Reproductive interference in laboratory experiments of interspecific  
511 competition. Popul Ecol. 57: 283-292.
- 512 Kishi S, Nishida T, Tsubaki Y. 2009. Reproductive interference determines persistence  
513 and exclusion in species interactions. J Anim Ecol. 78: 1043-1049.
- 514 Kishi S, Nakazawa T. 2013. Analysis of species coexistence co-mediated by resource  
515 competition and reproductive interference. Popul Ecol. 55: 305-313.
- 516 Kyogoku D, Nishida T. 2013. The mechanism of the fecundity reduction in  
517 *Callosobruchus maculatus* caused by *Callosobruchus chinensis* males. Popul Ecol. 55:  
518 87-93.

- 519 Macke E, Magalhães S, Bach F, Olivieri I. 2011. Experimental evolution of reduced sex  
520 ratio adjustment under local mate competition. *Science*. 334: 1127-1129.
- 521 Macke E, Magalhães S, Khanh HDT, Frantz A, Facon B, Olivieri I. 2012. Mating modifies  
522 female life history in a haplodiploid spider mite. *Am Nat*. 179: E147-E162.
- 523 Nishida S, Takakura KI, Nishida T, Matsumoto T, Kanaoka MM. 2012. Differential  
524 effects of reproductive interference by an alien congener on native *Taraxacum*  
525 species. *Biol Inv*. 14: 439-447.
- 526 Qazi MCB, Heifetz Y, Wolfner MF. 2003. The developments between gametogenesis and  
527 fertilization: ovulation and female sperm storage in *Drosophila melanogaster*. *Dev Biol*.  
528 256: 195–211.
- 529 Roeder CM. 1992. Sex ratio response of the two-spotted spider mite (*Tetranychus*  
530 *urticae* Koch) to changes in density under local mate competition. *Can J Zool*. 70: 1965-  
531 1967.
- 532 Sarmiento RA, Lemos F, Bleeker PM, Schuurink RC, Pallini A, Oliveira MGA, Lima ER,  
533 Kant M, Sabelis MW, Janssen A. 2011a. A herbivore that manipulates plant defence.  
534 *Ecol Lett*. 14: 229-236.
- 535 Sarmiento RA, Lemos, F., Dias, C.R., Kikuchi, W.T., Rodrigues, J.C., Pallini, A., Sabelis  
536 M.W. & Janssen, A. 2011b. A herbivorous mite down-regulates plant defence and  
537 produces web to exclude competitors. *PLoS One*. 6: 23757.

538 Sato Y, Alba JM, Sabelis M.W. 2014. Testing for reproductive interference in the  
539 population dynamics of two congeneric species of herbivorous mites. *Heredity* 113:  
540 495–502.

541 Sato Y, Rühr PT, Schmitz H, Egas M, Blanke A. 2016. Why do males choose  
542 heterospecific females in the red spider mite? *Exp Appl Acarol.* 68: 21-31.

543 Schlupp I. 2010. Mate Choice and the Amazon Molly: How Sexuality and Unisexuality  
544 Can Coexist. *J Hered.* 101: S55–S61.

545 Takafuji A. 1997. Reproductive interference and its consequences for the competitive  
546 interactions between two closely related *Panonychus* spider mites. – *Exp Appl Acarol.*  
547 21: 379-391.

548 Vahed K. 1998. The function of nuptial feeding in insects: review of empirical studies.  
549 *Biol Rev Camb Philos.* 73: 43–78.

550 Yassin A, David JR. 2016. Within-species reproductive costs affect the asymmetry of  
551 satyriation in *Drosophila*. *J Evol Biol.* 29: 455-60.

552 Xu J, Wang Q. 2011. Seminal fluid reduces female longevity and stimulates egg  
553 production and sperm trigger oviposition in a moth. *J Insect Physiol.* 57: 385-390.

554

## 555 **Supporting Information**

556 The following Supporting Information has been made available in the online version of  
557 this article.

558 Table S1 |Statistical tests and contrasts for the comparisons of fecundity and offspring  
559 sex ratio in crosses between conspecific and heterospecific males and females, using  
560 data from Block 1 or Blocks 1+2.  
561

Fig.1

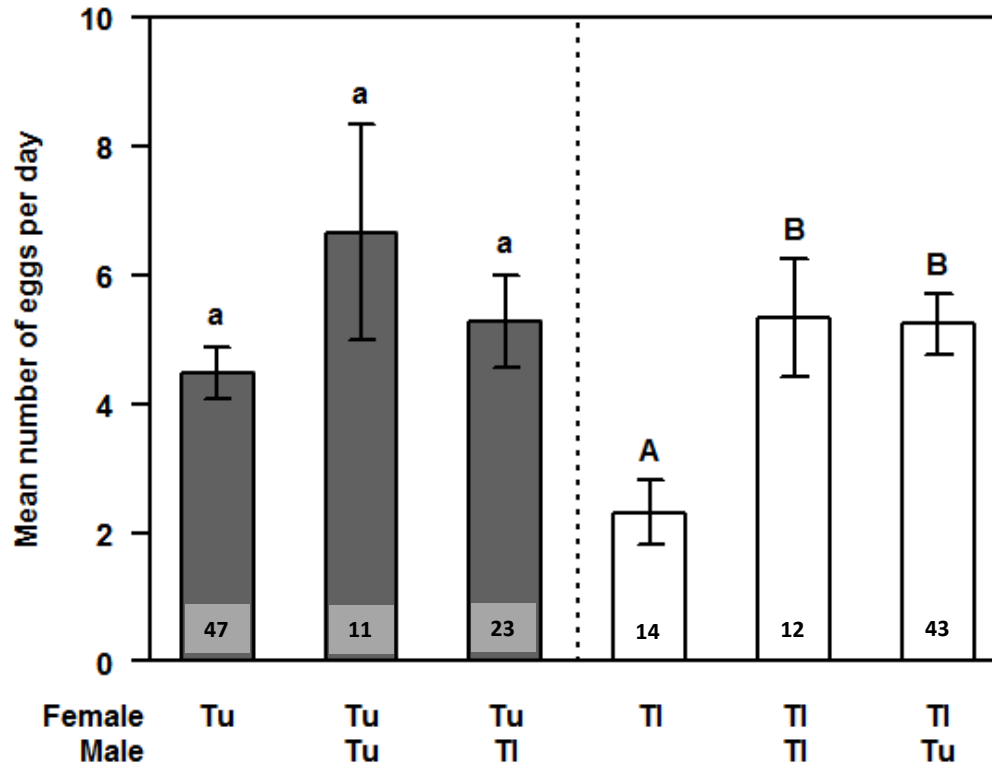

*T. urticae* versus *T. evansi*

Fig.2

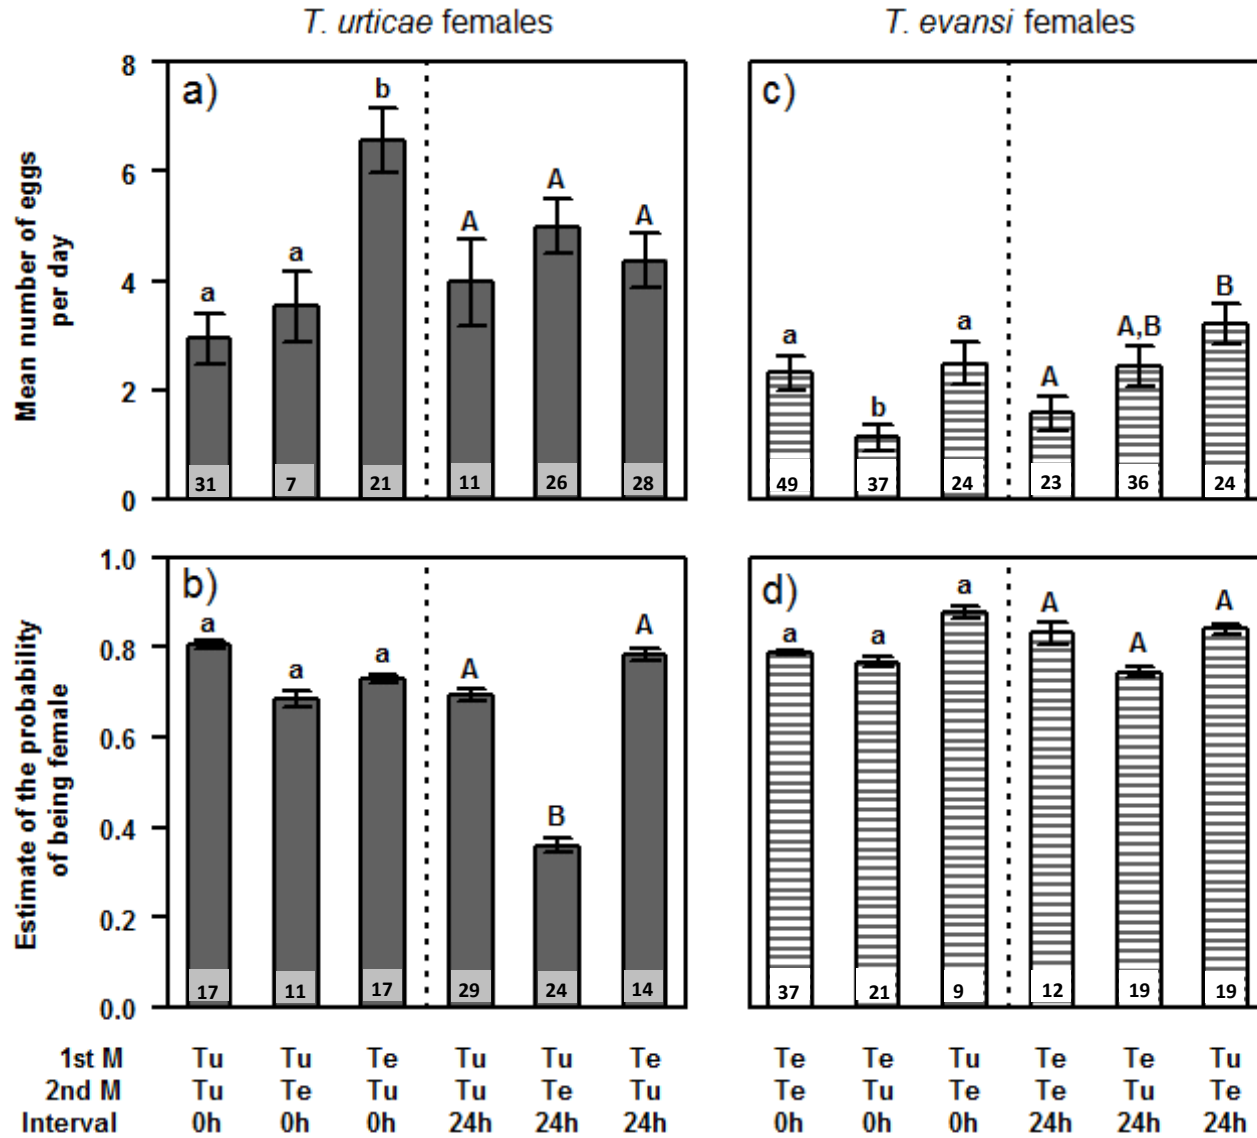

Fig.3

*T. urticae* versus *T. ludeni*

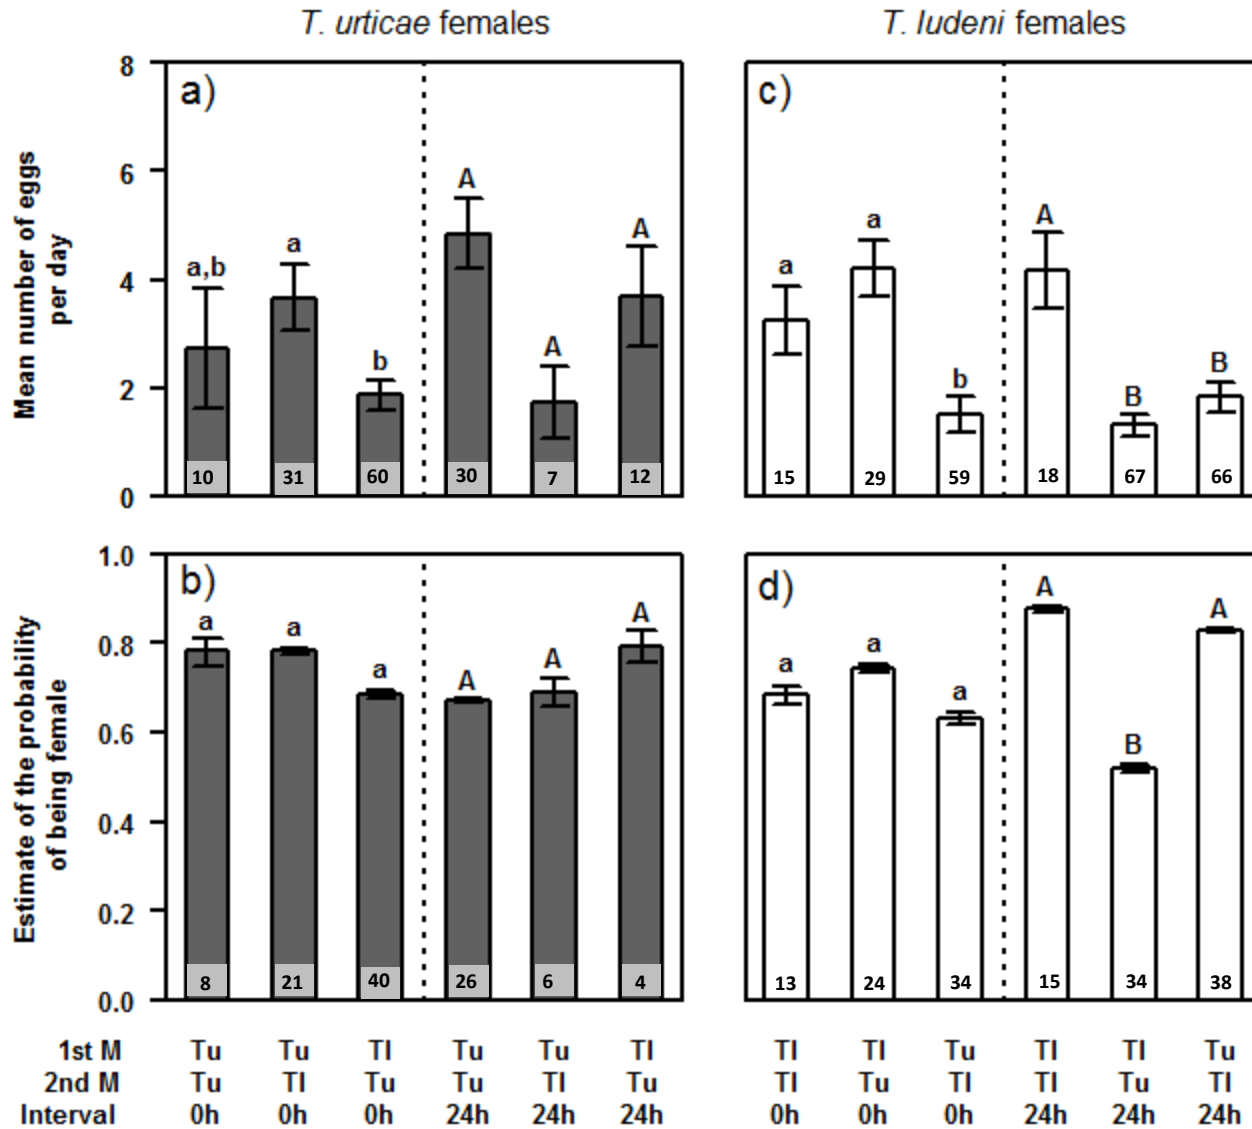

Source: http://www.biorxiv.org/content/10.1101/113274v6.full.pdf
